# Supplementary material for: Bacterial Seed Endophytes of the Holoparasitic Cistanche Armena and C. Phelypaea (Orobanchaceae) from Saline Habitats: Semi-Deserts vs Flooded Coasts
Source: Research Square preprint supplement (doi:10.21203/rs.3.rs-1043093/v1), 2021-11-18
Supplement: Supplementary file 1 [file 4a222b050494b5a4752b033a.docx]

**Bacterial seed endophytes of the holoparasitic *Cistanche armena* and *C. phelypaea* (Orobanchaceae) from saline habitats:** **semi-deserts vs flooded coasts**

**Kristine Petrosyan1,3*, Renata Piwowarczyk2, Karolina Ruraż2, Jaco Vangronsveld3,4 &Wiesław Kaca1**

1Department of Microbiology and Parasitology, Institute of Biology, Jan Kochanowski University, Uniwersytecka 7, 25-406 Kielce, Poland. E-mail: [kristine.petrosyan@phd.ujk.edu.pl](mailto:kristine.petrosyan@phd.ujk.edu.pl), wieslaw.kaca@ujk.edu.pl

2Center for Research and Conservation of Biodiversity, Department of Environmental Biology, Institute of Biology, Jan Kochanowski University, Uniwersytecka 7, 25-406 Kielce, Poland. E-mail: piwowarczyk@ujk.edu.pl; karolina.ruraz@ujk.edu.pl

3Centre for Environmental Sciences, Environmental Biology Research Group, Hasselt University, Agoralaan building D, 3590 Diepenbeek, Belgium. E-mail: jaco.vangronsveld@uhasselt.be

4Institute of Biological Sciences, Department of Plant Physiology and Biophysics, Faculty of Biology and Biotechnology, Maria Curie-Skłodowska University, Maria Curie-Skłodowska University, 19 Akademicka, 20–033 Lublin, Poland

*** Correspondence:**

Corresponding Author

e-mail: [kristine.petrosyan@phd.ujk.edu.pl](mailto:kristine.petrosyan@phd.ujk.edu.pl)

**Supplementary Information**

**The online version contains** **Supplementary Material 1** Total seed bacterial endophytic composition of holoparasitic plant species *Cistanche armena* and *C. phelypaea* at different taxonomic level
